# Supplementary material for: Validation of the Norma Latina Neuropsychological Assessment Battery in Patients with Alzheimer’s Disease in Mexico
Source: MDPI journal article supplement (doi:10.3390/ijerph191811322), 2022-09-08
Supplement: s1 [file s1]

## Supplementary Material S2

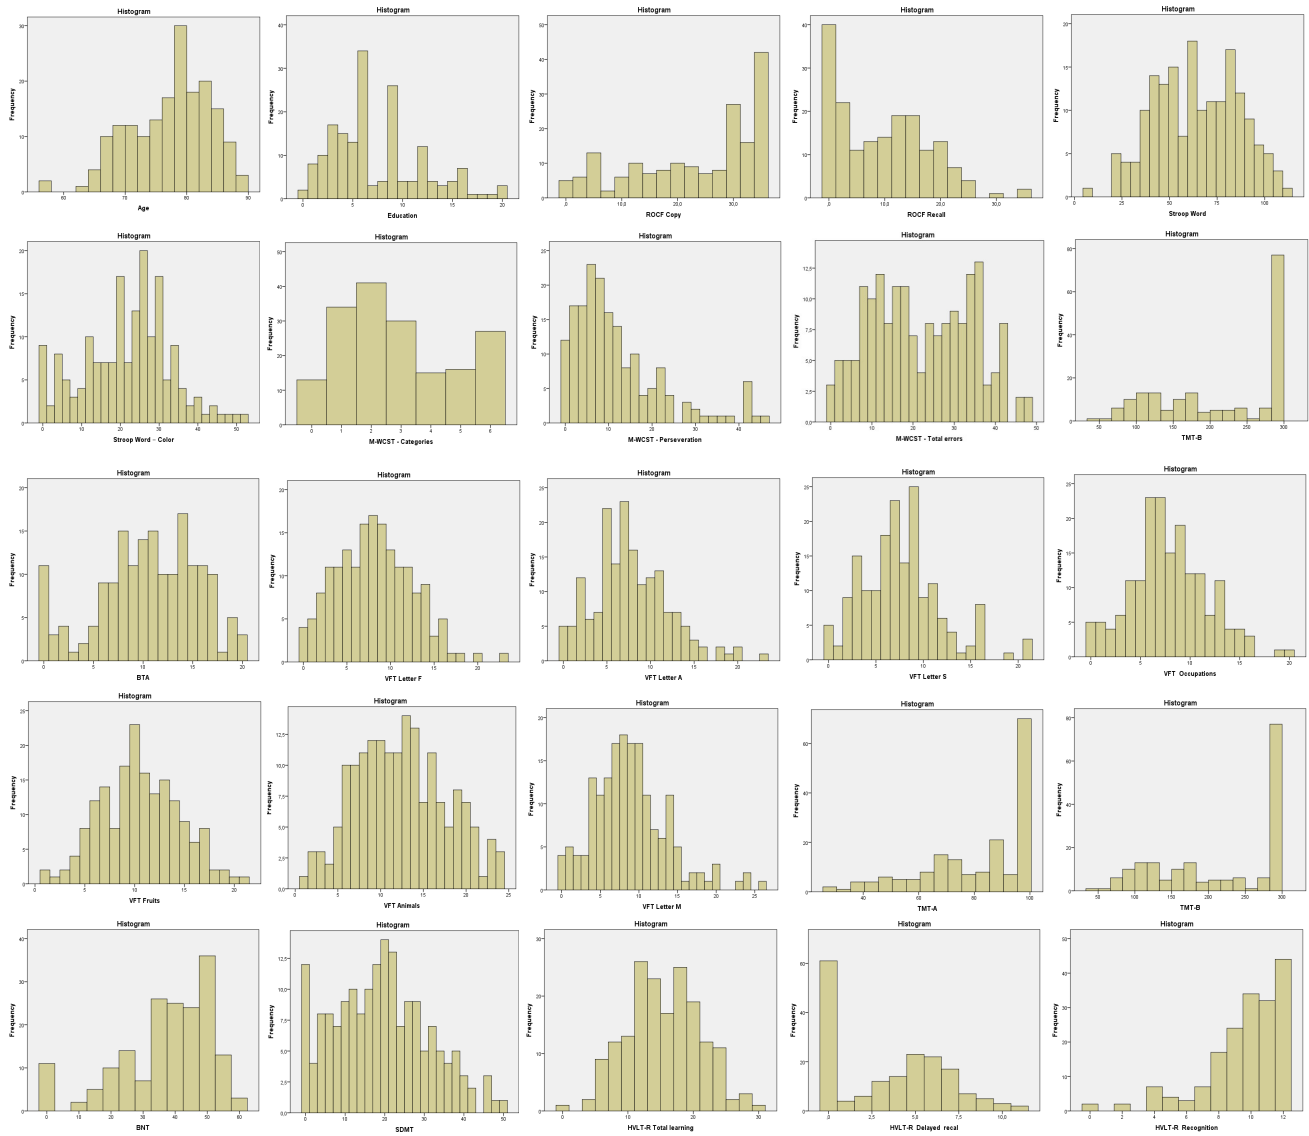

Figure S1. Test-score distribution.

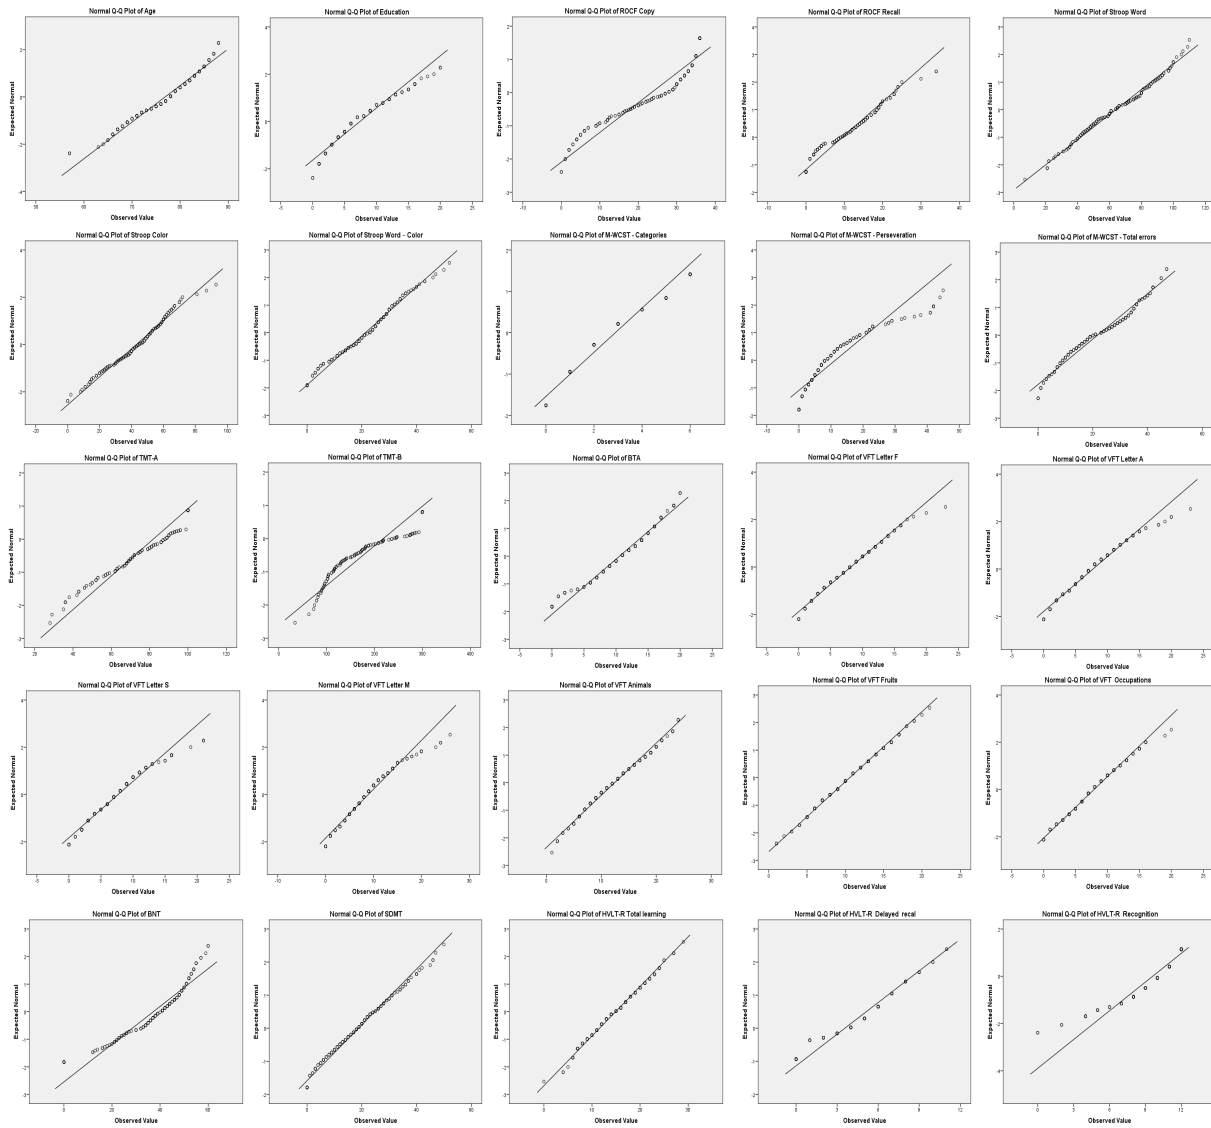

Figure S2. Q-Q plot by each test-score.

**Table S2.** Normality and homoscedasticity assumptions by each test-score

| Scores                 | Normality                       |         | Homoscedasticity |         |
|------------------------|---------------------------------|---------|------------------|---------|
|                        | Kolmogorov-Smirnov<br>Statistic | Sig.    | Levene Statistic | Sig.    |
| Age                    | 0.109                           | < 0.001 | 0.076            | 0.783   |
| Education              | 0.184                           | < 0.001 | 0.007            | 0.936   |
| ROCF Copy              | 0.173                           | < 0.001 | 24.031           | < 0.001 |
| ROCF Recall            | 0.148                           | < 0.001 | 61.133           | < 0.001 |
| Stroop Word            | 0.070                           | 0.036   | 0.003            | 0.954   |
| Stroop Color           | 0.069                           | 0.039   | 11.274           | 0.001   |
| Stroop Word – Color    | 0.071                           | 0.029   | 1.203            | 0.274   |
| Stroop Interference    | 0.054                           | 0.200   | 8.506            | 0.004   |
| M-WCST - Categories    | 0.182                           | < 0.001 | 12.558           | < 0.001 |
| M-WCST - Perseveration | 0.156                           | < 0.001 | 0.968            | 0.326   |
| M-WCST - Total errors  | 0.080                           | 0.008   | 7.489            | 0.007   |
| TMT-A                  | 0.202                           | < 0.001 | 19.140           | < 0.001 |
| TMT-B                  | 0.255                           | < 0.001 | 68.591           | < 0.001 |
| BTA                    | 0.084                           | 0.004   | 28.301           | < 0.001 |
| VFT Letter F           | 0.063                           | 0.090   | 0.041            | 0.840   |
| VFT Letter A           | 0.101                           | < 0.001 | 0.008            | 0.930   |
| VFT Letter S           | 0.120                           | < 0.001 | 0.859            | 0.355   |
| VFT Letter M           | 0.111                           | < 0.001 | 0.253            | 0.616   |
| VFT Animals            | 0.068                           | 0.044   | 0.563            | 0.454   |
| VFT Fruits             | 0.074                           | 0.019   | 0.740            | 0.391   |
| VFT Occupations        | 0.092                           | 0.001   | 0.136            | 0.713   |
| BNT                    | 0.118                           | 0.000   | 4.410            | 0.037   |
| SDMT                   | 0.057                           | 0.200   | 7.271            | 0.008   |
| HVLT-R Total learning  | 0.066                           | 0.058   | 0.514            | 0.474   |
| HVLT-R Delayed recall  | 0.219                           | < 0.001 | 36.070           | < 0.001 |
| HVLT-R Recognition     | 0.188                           | < 0.001 | 89.119           | < 0.001 |

*Note:* ROCF = Rey-Osterrieth Complex Figure; M-WCST = Modified Wisconsin Card Sorting Test; TMT-A = Trail Making Test- A; TMT-B = Trail Making Test -B; BTA= Brief Test of Attention; VFT = Verbal Fluency Test; BNT= Boston Naming Test; SDMT = Symbol Digit Modalities Test; HVLT-R = Hopkins Verbal Learning Test – Revised.
